# Supplementary material for: Structural Change from Nonparallel to Parallel G-Quadruplex Structures in Live Cancer Cells Detected in the Lysosomes Using Fluorescence Lifetime Imaging Microscopy
Source: MDPI journal article supplement (doi:10.3390/ijms232415799), 2022-12-13
Supplement: s1 [file s1]

## **Supporting Information**

### **Structural Change from Nonparallel to Parallel G-Quadruplex Structures in Live Cancer Cells Detected in the Lysosomes Using Fluorescence Lifetime Imaging Microscopy**

Ting-Yuan Tseng, Chiung-Lin Wang and Ta-Chau Chang \*

Institute of Atomic and Molecular Sciences, Academia Sinica, Taipei 10617, Taiwan

\* Corresponding author: Ta-Chau Chang (email: [tcchang@pub.iam.s.sinica.edu.tw](mailto:tcchang@pub.iam.s.sinica.edu.tw))

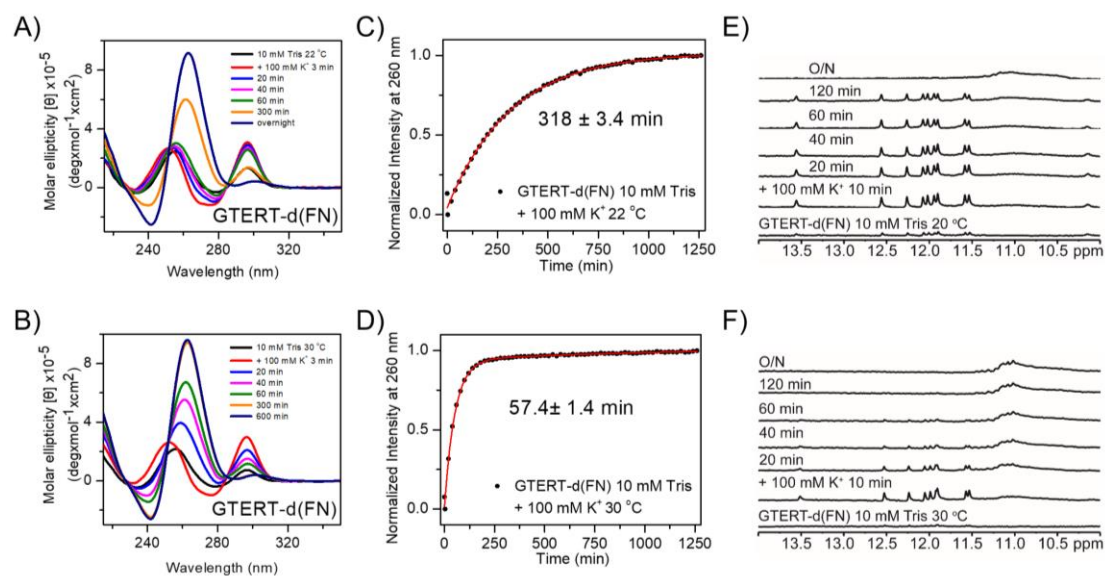

Figure S1. Temperature-dependent study of the structural conversion of GTERT-d(FN) in a  $K^+$  solution. Time-dependent CD spectra of GTERT-d(FN) in a 100 mM  $K^+$  solution at 22 °C (A) and 30 °C (B). The arising time of G4-2 signals obtained from a single exponential fitting at 265 nm is  $318 \pm 3.4$  min at 22 °C (C) and  $57.4 \pm 1.4$  min at 30 °C (D). Time-resolved imino proton spectra of GTERT-d(FN) recorded at 0, 10, 20, 40, 60, 120 min, and overnight after the addition of 100 mM  $K^+$  at 22 °C (E) and at 30 °C (F).

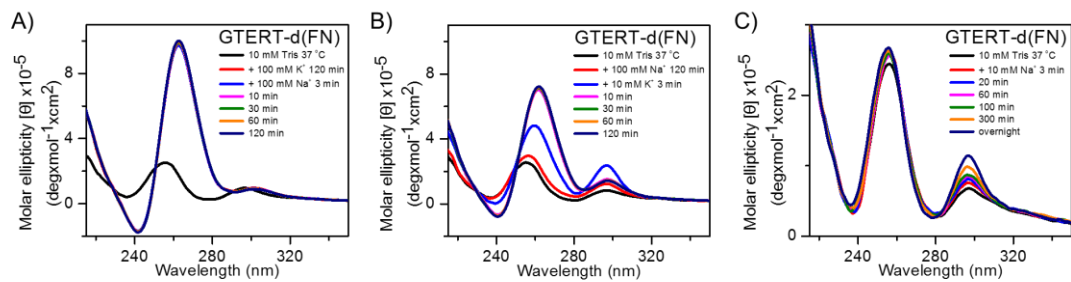

Figure S2. CD spectra of GTERT-d(FN) in a 100 mM K<sup>+</sup> solution for 2 h followed by the addition of 100 mM Na<sup>+</sup> for 3, 10, 30, 60, and 120 min (A). CD spectra of GTERT-d(FN) in a 100 mM Na<sup>+</sup> solution for 2 h followed by the addition of 10 mM K<sup>+</sup> for 3, 10, 30, 60, and 120 min (B). Time-dependent CD spectra of GTERT-d(FN) in a 10 mM Na<sup>+</sup> solution (C).

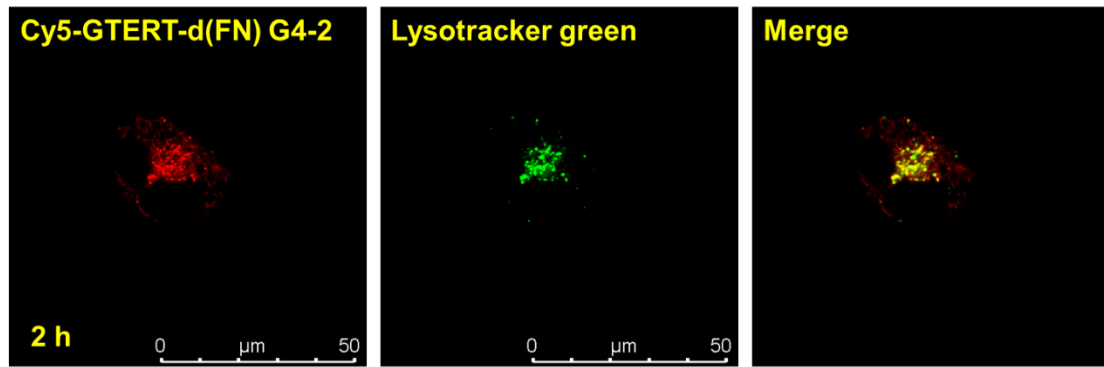

Figure S3. Confocal images of Cy5-GTERT-d(FN) G4-2 incubated with CL1-0 live cells for 2 h (left), and then stained by LysoTracker green at a concentration of 50 nM incubated with cells for 15 min (middle) together with their merges (right).
